# Supplementary material for: Monitoring CSF Proteome Alterations in Amyotrophic Lateral Sclerosis: Obstacles and Perspectives in Translating a Novel Marker Panel to the Clinic
Source: PubMed Central journal article supplement (PMC3435306; doi:10.1371/journal.pone.0044401), 2012-09-06
Supplement: pone.0044401.s004.pdf [file pone.0044401.s004.pdf]

**Table S2**  
**Comparison between MRM, MS/MS and Bisogenet pathway**

| Multiple Reaction Monitoring Quantification |                  |             |                                                                                        | MS/MS          | Pathway Analysis |                                                                                                    |
|---------------------------------------------|------------------|-------------|----------------------------------------------------------------------------------------|----------------|------------------|----------------------------------------------------------------------------------------------------|
| NextGen ID                                  | FC (ALS/control) | Gene Symbol | Protein Name                                                                           | Identification | Gene Symbol      | Protein Name                                                                                       |
| ORM1                                        | 1,06             | A1AG1_HUMAN | Alpha-1-acid glycoprotein 1                                                            |                |                  |                                                                                                    |
| SERPINA3                                    | 1,08             | AACT_HUMAN  | Alpha-1-antichymotrypsin                                                               |                |                  |                                                                                                    |
| SERPINA1                                    | 0,96             | A1AT_HUMAN  | Alpha-1-antitrypsin ①                                                                  | ◇              | A1AT             | Alpha-1-antitrypsin ①                                                                              |
| A1BG                                        | 0,97             | A1BG_HUMAN  | Alpha-1B-glycoprotein                                                                  |                | ABCF3            | ATP-binding cassette, sub-family F (GCN20), member 3                                               |
| AHSG                                        | 0,74             | FETUA_HUMAN | Alpha-2-HS-glycoprotein                                                                | *              | ACP5             | Acid phosphatase 5, tartrate resistant                                                             |
| APP                                         | 0,97             | A4_HUMAN    | Amyloid beta A4 protein                                                                |                | ADAMTS4          | ADAM metalloproteinase with                                                                        |
| APLP2                                       | 1,03             | APLP2_HUMAN | Amyloid-like protein 2                                                                 |                | ATXN1            | Thrombospondin type 1 motif, 4<br>Ataxin 1                                                         |
| AGT                                         | 1,04             | ANGT_HUMAN  | Angiotensinogen                                                                        |                | CSNK2A1          | Casein kinase 2, alpha 1 polypeptide                                                               |
| APOA1                                       | 0,98             | APOA1_HUMAN | Apolipoprotein A-I                                                                     |                | CSNK2A1P         | Casein kinase 2, alpha 1 polypeptide pseudogene                                                    |
| APOA4                                       | 0,80             | APOA4_HUMAN | Apolipoprotein A-IV                                                                    |                | CSNK2A2          | Casein kinase 2, alpha prime polypeptide                                                           |
| APOD                                        | 1,06             | APOD_HUMAN  | Apolipoprotein D                                                                       | *              |                  |                                                                                                    |
| APOE                                        | 0,95             | APOE_HUMAN  | Apolipoprotein E                                                                       | *              | CANX             | Calnexin                                                                                           |
| ATRN                                        | 1,00             | ATRN_HUMAN  | Attractin                                                                              |                | CASP3            | Caspase 3                                                                                          |
| APOH                                        | 0,70             | APOH_HUMAN  | Beta-2-glycoprotein 1                                                                  | *              | CASP8            | Caspase 8                                                                                          |
| B2M                                         | 1,07             | B2MG_HUMAN  | Beta-2-microglobulin                                                                   | *              | CD44             | CD44 antigen                                                                                       |
| CNDP1                                       | 1,04             | CNDP1_HUMAN | Beta-Ala-His dipeptidase                                                               |                | CELA1            | Chymotrypsin-like elastase 1                                                                       |
| CDH13                                       | 0,92             | CAD13_HUMAN | Cadherin-13                                                                            |                | CTSL1            | Cathepsin L1                                                                                       |
| CLSTN1                                      | 0,98             | CSTN1_HUMAN | Calsyntenin-1                                                                          |                | CTSB             | Cathepsin B                                                                                        |
| CTSD                                        | 0,91             | CATD_HUMAN  | Cathepsin D ②                                                                          |                | CTSD             | Cathepsin D ②                                                                                      |
| CP                                          | 0,91             | CERU_HUMAN  | Ceruloplasmin                                                                          |                | CTSG             | Cathepsin G                                                                                        |
| CH3L1                                       | 1,31             | CH3L1_HUMAN | Chitinase-3-like protein 1                                                             |                | CTSS             | Cathepsin S                                                                                        |
| CHGA                                        | 0,90             | CMGA_HUMAN  | Chromogranin-A ①                                                                       |                | CHGA             | Chromogranin-A ①                                                                                   |
| CLU                                         | 0,91             | CLUS_HUMAN  | Clusterin                                                                              |                |                  |                                                                                                    |
| C2                                          | 0,94             | CO2_HUMAN   | Complement C2                                                                          |                |                  |                                                                                                    |
| C3                                          | 0,94             | CO3_HUMAN   | Complement C3 ③                                                                        |                | C4A              | Complement component 4A ③                                                                          |
| C8B                                         | 0,96             | CO8B_HUMAN  | Complement component C8 beta chain                                                     |                |                  |                                                                                                    |
| C9                                          | 0,92             | CO9_HUMAN   | Complement component C9                                                                |                |                  |                                                                                                    |
| CFH                                         | 0,96             | CFAH_HUMAN  | Complement factor H                                                                    |                |                  |                                                                                                    |
| CFHR2                                       | 0,59             | FHR2_HUMAN  | Complement factor H-related protein 2                                                  |                |                  |                                                                                                    |
| CNTN1                                       | 1,01             | CNTN1_HUMAN | Contactin-1                                                                            |                |                  |                                                                                                    |
| CNTN2                                       | 0,99             | CNTN2_HUMAN | Contactin-2                                                                            |                |                  |                                                                                                    |
| SERPINA6                                    | 1,13             | CBG_HUMAN   | Corticosteroid-binding globulin                                                        |                |                  |                                                                                                    |
| CST3                                        | 0,96             | CYTC_HUMAN  | Cystatin-C ①<br>Ectonucleotide<br>pyrophosphatase/phosphodiesterase<br>family member 2 | ◇              | CST3             | Cystatin C ①                                                                                       |
| ENPP2                                       | 0,95             | ENPP2_HUMAN |                                                                                        |                | CSTB             | Cystatin B (stefin B)                                                                              |
| EXTL2                                       | 1,01             | EXTL2_HUMAN | Exostosin-like 2                                                                       |                | CTNBL            | Catenin, beta like 1                                                                               |
| FN1                                         | 0,97             | FINC_HUMAN  | Fibronectin                                                                            |                | CTRB1            | Chymotrypsinogen B1                                                                                |
| GSN                                         | 0,87             | GELS_HUMAN  | Gelsolin                                                                               |                | DERL2            | Der1-like domain family, member 2                                                                  |
| HPX                                         | 0,83             | HEMO_HUMAN  | Hemopexin                                                                              |                | DERL3            | Der1-like domain family, member 3                                                                  |
| SERPIND1                                    | 0,88             | HEP2_HUMAN  | Heparin cofactor 2                                                                     |                | ELANE            | Elastase, neutrophil expressed                                                                     |
| HABP2                                       | 0,81             | HABP2_HUMAN | Hyaluronan-binding protein 2                                                           |                |                  |                                                                                                    |
| IGHA1                                       | 0,85             | IGHA1_HUMAN | Ig alpha-1 chain C region                                                              |                | GRB2             | Growth factor receptor-bound protein 2                                                             |
| IGHM                                        | 0,97             | IGHM_HUMAN  | Ig mu chain C region                                                                   |                |                  |                                                                                                    |
| IGFBP3                                      | 0,67             | IBP3_HUMAN  | Insulin-like growth factor-binding<br>protein 3 ④                                      |                | IGFBP5           | Insulin-like growth factor binding protein<br>5 ④                                                  |
| Bri2-23                                     | 0,65             | ITM2B_HUMAN | Integral membrane protein 2B (23AA<br>peptide released from ITM2B (BRI2))              |                | KLK3             | Kallikrein-related peptidase 3                                                                     |
| KLK6                                        | 1,03             | KLK6_HUMAN  | Kallikrein-6 ④                                                                         |                | KLK5             | Kallikrein-related peptidase 5 ④                                                                   |
| KNG1                                        | 0,86             | KNG1_HUMAN  | Kininogen-1                                                                            |                | KLK13            | Kallikrein-related peptidase 13                                                                    |
| LRG1                                        | 1,05             | A2GL_HUMAN  | Leucine-rich alpha-2-glycoprotein                                                      |                | ITGA5            | Integrin, alpha 5 (fibronectin receptor,<br>alpha polypeptide)                                     |
| LUM                                         | 0,93             | LUM_HUMAN   | Lumican                                                                                |                | ITGA9            | Integrin, alpha 9                                                                                  |
| B3GNT1                                      | 0,94             | B3GN1_HUMAN | N-acetylglucosaminide beta-1,3-N-<br>acetylglucosaminyltransferase                     |                | ITGAV            | Integrin, alpha V (vitronectin receptor,<br>alpha polypeptide, antigen CD51)                       |
| PGLYRP2                                     | 0,89             | PGRP2_HUMAN | N-acetylmuramoyl-L-alanine amidase                                                     |                | ITGB1            | Integrin, beta 1 (fibronectin receptor, beta<br>polypeptide, antigen CD29 includes<br>MDF2, MSK12) |
| NCAM1                                       | 1,02             | NCAM1_HUMAN | Neural cell adhesion molecule 1                                                        |                | MMP11            | Matrix metalloproteinase 11 (stromelysin<br>3)                                                     |
| NRCAM                                       | 1,01             | NRCAM_HUMAN | Neuronal cell adhesion molecule                                                        |                | MMP26            | Matrix metalloproteinase 26                                                                        |
| NPTXR                                       | 0,97             | NPTXR_HUMAN | Neuronal pentraxin receptor                                                            |                | MMP3             | Matrix metalloproteinase 3 (stromelysin 1,<br>progelatinase)                                       |

|          |      |             |                                                  |   |        |                                                                                     |
|----------|------|-------------|--------------------------------------------------|---|--------|-------------------------------------------------------------------------------------|
| NPTX1    | 1,00 | NPTX1_HUMAN | Neuronal pentraxin-1                             |   | MMP7   | Matrix metalloproteinase 7 (matrilysin, uterine)                                    |
| VEGF     | 0,79 | VEGF_HUMAN  | Neurosecretory protein VEGF ①                    | ◇ | VEGF   | Neurosecretory protein VEGF ①<br>Low density lipoprotein receptor-related protein 1 |
| SERPIN1  | 0,95 | NEUS_HUMAN  | Neuroserpin                                      |   | LRP1   | Secreted phosphoprotein 1 ①                                                         |
| SPP1     | 0,94 | OSTP_HUMAN  | Secreted phosphoprotein 1 ①                      | ◇ | SPP1   | Secreted phosphoprotein 1 ①                                                         |
| SERPINF1 | 0,91 | PEDF_HUMAN  | Pigment epithelium-derived factor                |   | PDLIM7 | PDZ and LIM domain 7 (enigma)                                                       |
| SERPING1 | 0,92 | IC1_HUMAN   | Plasma protease C1 inhibitor                     |   | PDZD2  | PDZ domain containing 2                                                             |
| PLG      | 0,89 | PLMN_HUMAN  | Plasminogen ②                                    |   | PLG    | Plasminogen ②                                                                       |
| PCSK1N   | 0,94 | PCSK1_HUMAN | ProSAAS                                          | * | PRSS1  | Protease, serine, 1 (trypsin 1)                                                     |
| PTGDS    | 1,01 | PTGDS_HUMAN | Prostaglandin-H2 D-isomerase                     | * | PRSS2  | Protease, serine, 2 (trypsin 2)                                                     |
| AMBP     | 0,72 | AMBP_HUMAN  | Protein AMBP                                     |   | PRSS3  | Protease, serine, 3                                                                 |
| CUTA     | 1,04 | CUTA_HUMAN  | Protein CutA                                     |   | PRTN3  | Proteinase 3                                                                        |
| PARK7    | 0,87 | PARK7_HUMAN | Protein DJ-1<br>Protein kinase C-binding protein |   | PRKG1  | Protein kinase, cGMP-dependent, type I                                              |
| NELL2    | 0,98 | NELL2_HUMAN | NELL2 ③                                          |   | PRKCA  | Protein kinase C, alpha ③                                                           |
| F2       | 0,79 | THRB_HUMAN  | Thrombin ②                                       |   | F2     | Thrombin ②                                                                          |
| RBP4     | 0,81 | RET4_HUMAN  | Retinol-binding protein 4                        |   |        |                                                                                     |
| CHGB     | 1,03 | SCG1_HUMAN  | Secretogranin-1                                  | * |        |                                                                                     |
| SCG2     | 0,92 | SCG2_HUMAN  | Secretogranin-2                                  |   |        |                                                                                     |
| SCG3     | 0,93 | SCG3_HUMAN  | Secretogranin-3 ②                                |   | SCG3   | Secretogranin-3 ②                                                                   |
| SEPP1    | 0,78 | SEPP1_HUMAN | Selenoprotein P                                  |   |        |                                                                                     |
| TF       | 0,93 | TRFE_HUMAN  | Serotransferrin                                  | * |        |                                                                                     |
| PON1     | 1,10 | PON1_HUMAN  | Serum paraoxonase/arylesterase 1                 |   | RAP2A  | RAP2A, member of RAS oncogene family                                                |
| SPARCL1  | 0,87 | SPRL1_HUMAN | SPARC-like protein 1                             | * | SGTA   | Small glutamine-rich tetratricopeptide repeat (TPR)-containing, alpha               |
| CLEC3B   | 0,83 | TETN_HUMAN  | Tetranectin                                      |   |        |                                                                                     |
| TTR      | 0,95 | TTHY_HUMAN  | Transthyretin                                    | * | SSR1   | Signal sequence receptor, alpha                                                     |
| GC       | 0,94 | VTDB_HUMAN  | Vitamin D-binding protein                        |   | UBC    | Ubiquitin C                                                                         |
| PROS1    | 0,90 | PROS_HUMAN  | Vitamin K-dependent protein S                    |   | UBQLN4 | Ubiquilin 4                                                                         |
| AZGP1    | 0,91 | ZA2G_HUMAN  | Zinc-alpha-2-glycoprotein                        |   | UGGT1  | UDP-glucose glycoprotein glucosyltransferase 1                                      |

- ① MRM assay matched classifier protein
- ② additional match between MRM assay and pathway
- ③ closely related proteins in MRM panel and pathway
- ◇ MS/MS independently identified classifier protein
- \* MS/MS independently identified protein

Fold change: >1: upregulated in ALS CSF samples; <1: downregulated in ALS CSF samples
